# Supplementary material for: Vibrational spectroscopy as a probe of heterogeneities within geochemical thin films on macro, micro, and nanoscales
Source: Royal Society of Chemistry journal article supplement (doi:10.1039/d3ra05179j), 2023-01-01
Supplement: d3ra05179j1.pdf [file d3ra05179j1.pdf]

*Electronic Supporting Information:*

**Vibrational Spectroscopy as a Probe of Geochemical Thin Films and  
Single Particle on Macro, Micro and Nanoscales**

Deborah Kim, Samantha Townsley and Vicki H. Grassian\*

Department of Chemistry and Biochemistry, University of California San Diego, La Jolla, CA

92037

\*Author to whom correspondence may be addressed. Email: [vhgrassian@ucsd.edu](mailto:vhgrassian@ucsd.edu)

**Electronic Supplementary Information Content:** This Electronic Supplementary Information (ESI) is 9 pages total with references. The ESI contains 4 figures and 7 tables.

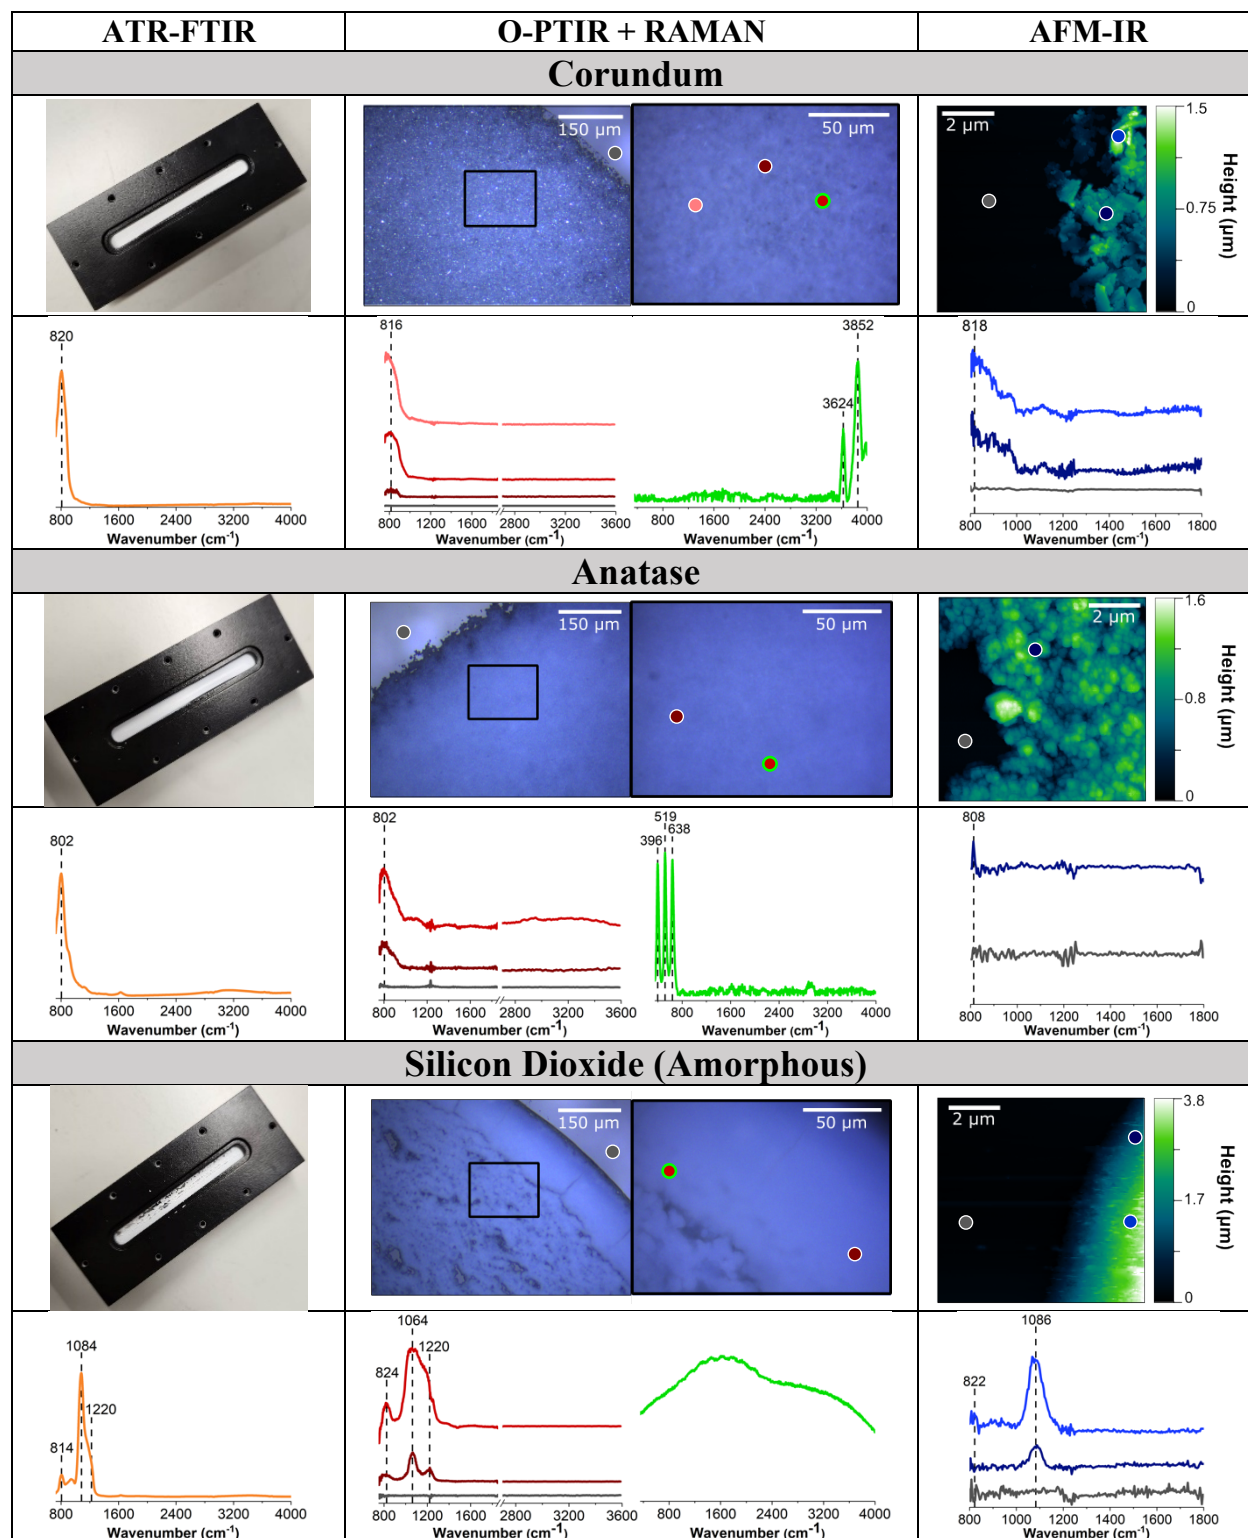

**Figure S1.** Images and spectra recorded for different oxide minerals – corundum, anatase and silicon dioxide (amorphous) utilizing ATR-FTIR spectroscopy, O-PTIR and Raman spectroscopy and AFM-IR spectroscopy.

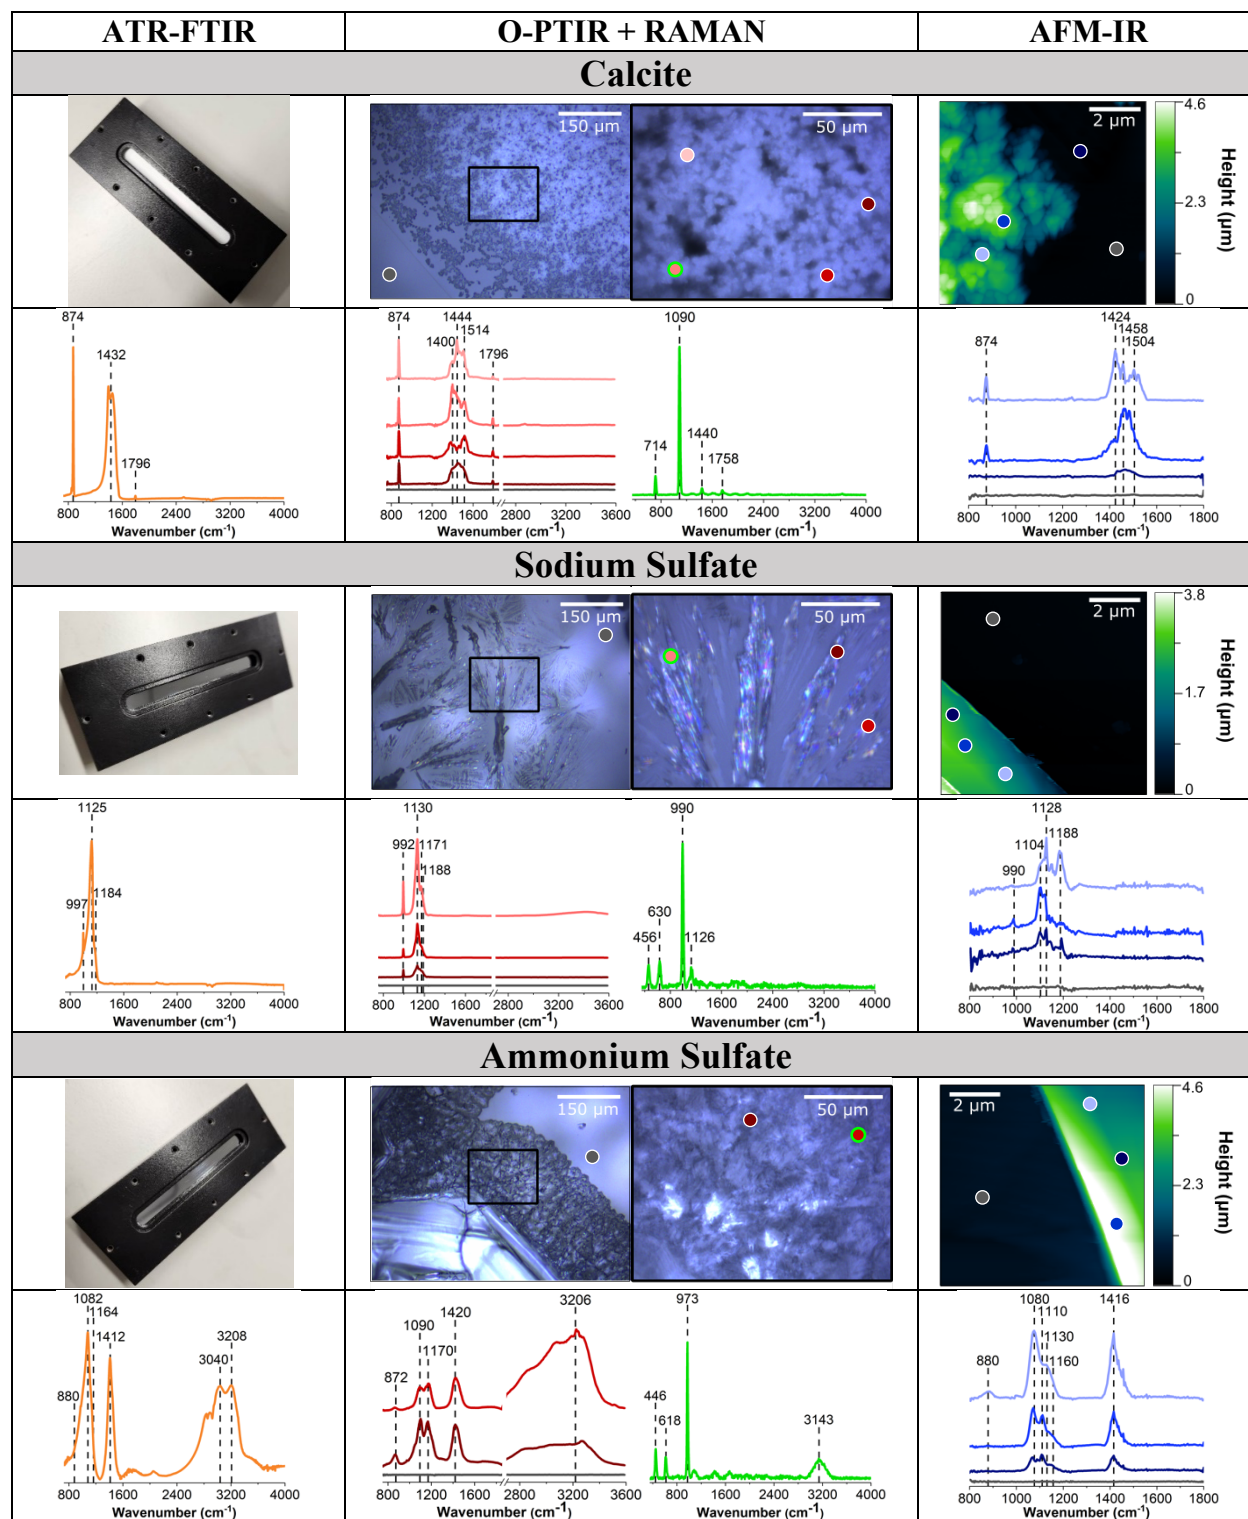

**Figure S2.** Images and spectra recorded for different carbonate and sulfate minerals – calcite, sodium sulfate and ammonium sulfate utilizing ATR-FTIR spectroscopy, O-PTIR and Raman spectroscopy and AFM-IR spectroscopy.

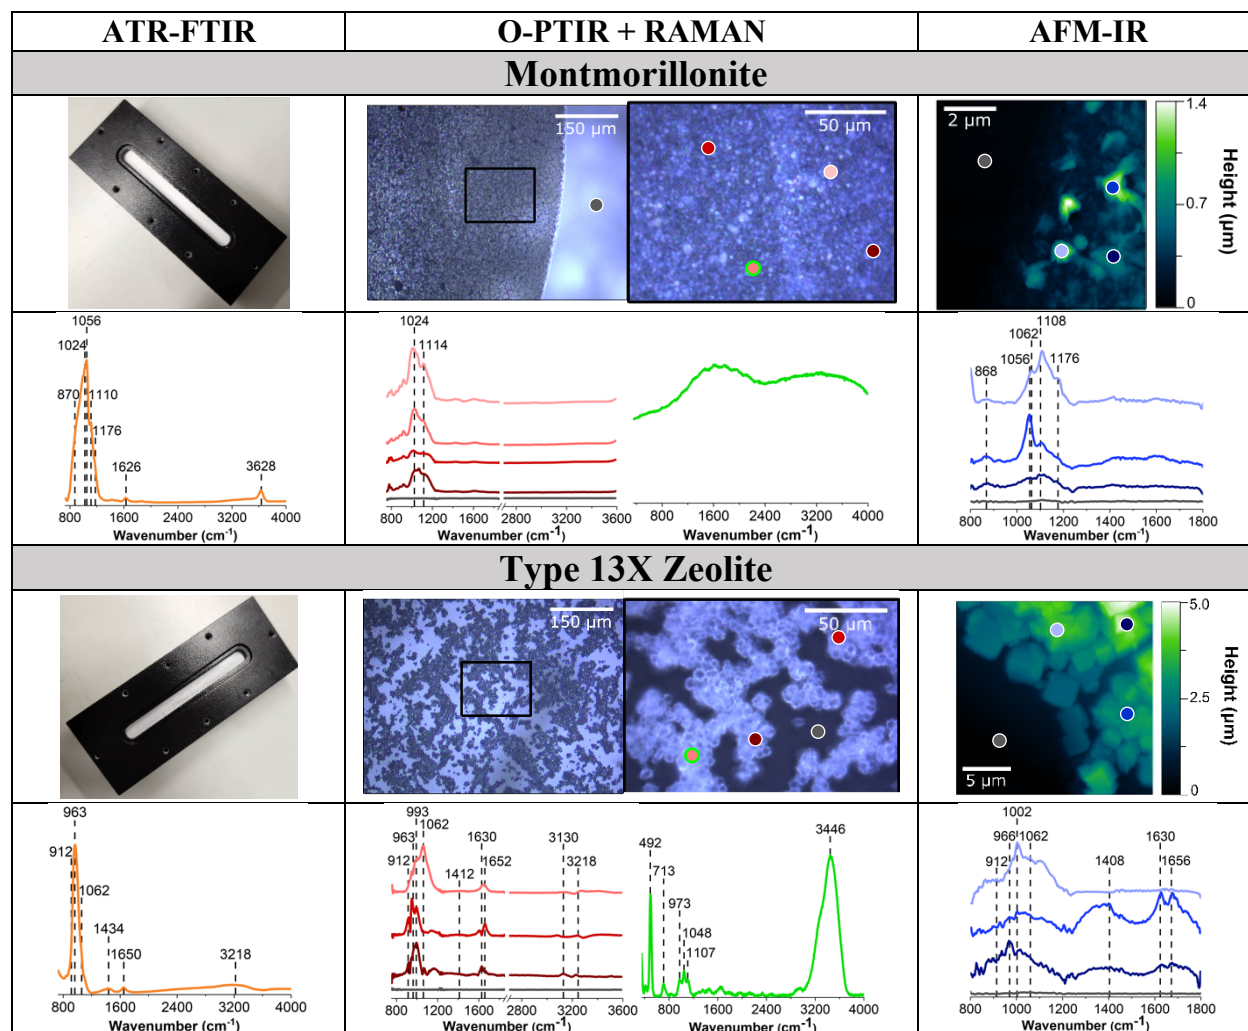

**Figure S3.** Images and spectra recorded for different aluminosilicates – montmorillonite and zeolite utilizing ATR-FTIR spectroscopy, O-PTIR and Raman spectroscopy and AFM-IR spectroscopy.

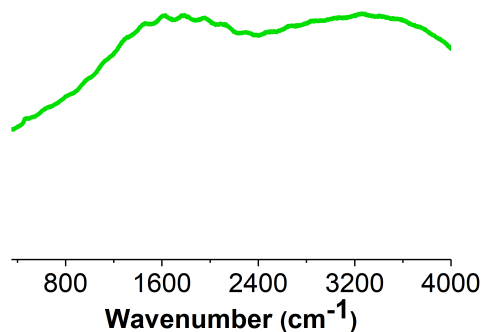

**Figure S4.** Raman spectrum for Arizona Test Dust (AZTD). As can be seen, fluorescence signal is observed.

**Table S1.** Summary of classes of minerals, minerals, CAS numbers and sources used.

| Classes of Minerals                | Minerals                                            | CAS #        | Source                                    |
|------------------------------------|-----------------------------------------------------|--------------|-------------------------------------------|
| Oxides                             | $\alpha$ -FeOOH (Goethite)                          | 20344-49-4   | Alfa Aesar                                |
|                                    | $\alpha$ -Al <sub>2</sub> O <sub>3</sub> (Corundum) | 1344-28-1    | Alfa Aesar                                |
|                                    | TiO <sub>2</sub> (Anatase)                          | 13463-67-7   | Nanostructured & Amorphous Materials Inc. |
|                                    | SiO <sub>2</sub> (Amorphous)                        | 7631-86-9    | Aldrich Chemistry                         |
| Carbonates, Sulfates, and Nitrates | NaNO <sub>3</sub>                                   | 7631-99-4    | Sigma Aldrich                             |
|                                    | CaCO <sub>3</sub> (Calcite)                         | 471-34-1     | Alfa Aesar                                |
|                                    | Na <sub>2</sub> SO <sub>4</sub>                     | 7757-82-6    | Fisher Chemical                           |
|                                    | (NH <sub>4</sub> ) <sub>2</sub> SO <sub>4</sub>     | 7783-20-2    | Fisher Scientific                         |
| Clays and Aluminosilicates         | Kaolinite                                           | 1318-74-7    | Sigma-Aldrich                             |
|                                    | Montmorillonite                                     | SWy-2 *      | The Clay Minerals Society                 |
|                                    | Zeolite (Type 13X)                                  | 1318-02-1    | Sigma Aldrich                             |
| Complex Multi-component Samples    | Arizona Test Dust                                   | ISO 12103-1* | Powder Technology Inc.                    |

\*CAS # is not provided, so specific sample type is provided instead.

**Table S2.** Vibrational mode assignments of different mineral oxides from infrared spectroscopy utilizing ATR-FTIR, O-PTIR, and AFM-IR spectroscopy.

| Sample                                                             | Wavenumber (cm <sup>-1</sup> ) |            |        | Assignment      |
|--------------------------------------------------------------------|--------------------------------|------------|--------|-----------------|
|                                                                    | ATR-FTIR                       | O-PTIR     | AFM-IR |                 |
| Corundum ( $\alpha$ -Al <sub>2</sub> O <sub>3</sub> ) <sup>1</sup> | 820                            | 816        | 818    | Al-O stretch    |
| Anatase (TiO <sub>2</sub> ) <sup>2</sup>                           | 802                            | 802        | 808    | Ti-O stretch    |
| Amorphous SiO <sub>2</sub> <sup>3,4</sup>                          | 814                            | 824        | 822    | Si-O stretch    |
|                                                                    | 1084, 1220                     | 1064, 1220 | 1086   | Si-O-Si stretch |

**Table S3.** Vibrational mode assignments of different mineral oxides from micro-Raman spectroscopy.

| Sample                                                             | Wavenumber (cm <sup>-1</sup> ) | Assignment   |
|--------------------------------------------------------------------|--------------------------------|--------------|
|                                                                    | Raman                          |              |
| Corundum ( $\alpha$ -Al <sub>2</sub> O <sub>3</sub> ) <sup>5</sup> | 3624                           | O-H stretch  |
|                                                                    | 3852                           |              |
| Anatase (TiO <sub>2</sub> ) <sup>6-8</sup>                         | 396                            | O-Ti-O bend  |
|                                                                    | 519                            | Ti-O stretch |
|                                                                    | 638                            | Ti-O bend    |
| Amorphous SiO <sub>2</sub>                                         | Fluorescence signal observed   | –            |

**Table S4.** Vibrational mode assignments of different carbonate and sulfates from infrared spectroscopy utilizing ATR-FTIR, O-PTIR, and AFM-IR spectroscopy.

| Compound                                     | Wavenumber (cm <sup>-1</sup> ) |                  |                        | Assignment                                      |
|----------------------------------------------|--------------------------------|------------------|------------------------|-------------------------------------------------|
|                                              | <i>ATR-FTIR</i>                | <i>O-PTIR</i>    | <i>AFM-IR</i>          |                                                 |
| Calcite (CaCO <sub>3</sub> ) <sup>9,10</sup> | 874                            | 874              | 874                    | $\nu_2$ , Out-of-plane bend                     |
|                                              | 1432                           | 1400, 1444, 1514 | 1424, 1458, 1504       | $\nu_3$ , Asymmetric stretch                    |
|                                              | 1796                           | 1796             | --                     | Combination bands ( $\nu_1 + \nu_4$ )           |
| Sodium Sulfate <sup>11,12</sup>              | 997                            | 992              | 990                    | $\nu_1$ , SO <sub>4</sub> <sup>2-</sup> stretch |
|                                              | 1125, 1184                     | 1130, 1171, 1188 | 1104, 1128, 1188       | $\nu_3$ , SO <sub>4</sub> <sup>2-</sup> stretch |
| Ammonium Sulfate <sup>13,14</sup>            | 1082, 1164                     | 1090, 1170       | 1080, 1110, 1130, 1160 | $\nu_3$ , SO <sub>4</sub> <sup>2-</sup> stretch |
|                                              | 1412                           | 1420             | 1416                   | $\nu_4$ , NH <sub>4</sub> <sup>+</sup> stretch  |
|                                              | 3040, 3208                     | 3206             | --                     | $\nu_3$ , NH <sub>4</sub> <sup>+</sup> stretch  |

**Table S5.** Vibrational mode assignments of different carbonate and sulfates from micro-Raman spectroscopy.

| Compound                                   | Wavenumber (cm <sup>-1</sup> ) | Assignment                                      |
|--------------------------------------------|--------------------------------|-------------------------------------------------|
|                                            | <i>Raman</i>                   |                                                 |
| Calcite (CaCO <sub>3</sub> ) <sup>15</sup> | 714                            | $\nu_4$ , in-plane bend                         |
|                                            | 1090                           | $\nu_1$ , symmetric stretch                     |
|                                            | 1440                           | $\nu_3$ , asymmetric stretch                    |
|                                            | 1758                           | Combination bands ( $\nu_1 + \nu_4$ )           |
| Sodium Sulfate <sup>16,17</sup>            | 456                            | $\nu_2$ , SO <sub>4</sub> <sup>2-</sup> stretch |
|                                            | 630                            | $\nu_4$ , SO <sub>4</sub> <sup>2-</sup> stretch |
|                                            | 990                            | $\nu_1$ , SO <sub>4</sub> <sup>2-</sup> stretch |
|                                            | 1126                           | $\nu_3$ , SO <sub>4</sub> <sup>2-</sup> stretch |
| Ammonium Sulfate <sup>13,16-19</sup>       | 446                            | $\nu_2$ , SO <sub>4</sub> <sup>2-</sup> stretch |
|                                            | 618                            | $\nu_4$ , SO <sub>4</sub> <sup>2-</sup> stretch |
|                                            | 973                            | $\nu_1$ , SO <sub>4</sub> <sup>2-</sup> stretch |
|                                            | 3143                           | N-H stretch                                     |

**Table S6.** Vibrational mode assignments of different aluminosilicates from infrared spectroscopy utilizing ATR-FTIR, O-PTIR, and AFM-IR spectroscopy.

| Compound                      | Wavenumber (cm <sup>-1</sup> ) |                     |                        | Assignment                      |
|-------------------------------|--------------------------------|---------------------|------------------------|---------------------------------|
|                               | <i>ATR-FTIR</i>                | <i>O-PTIR</i>       | <i>AFM-IR</i>          |                                 |
| Montmorillonite <sup>20</sup> | 870                            | 874                 | 868                    | Al-Fe-OH bend                   |
|                               | 1024, 1056, 1110, 1176         | 1024, 1114          | 1056, 1062, 1108, 1176 | Si-O stretch                    |
|                               | 1626                           | --                  | --                     | O-H bend                        |
|                               | 3628                           | --                  | --                     | O-H stretch                     |
| Zeolite <sup>21</sup>         | 912, 963, 1062                 | 912, 963, 983, 1062 | 912, 966, 1002, 1062   | Al-O or Si-O asymmetric stretch |
|                               | 1434                           | 1412                | 1408                   | AlO <sub>4</sub> tetrahedra     |
|                               | 1650                           | 1630, 1650          | 1630, 1656             | O-H bend                        |
|                               | 3218                           | 3130, 3218          | --                     | O-H bend                        |

**Table S7.** Vibrational mode assignments and observation of fluorescence for different aluminosilicates and for AZTD

| Compound                 | Wavenumber (cm <sup>-1</sup> ) | Assignment                                |
|--------------------------|--------------------------------|-------------------------------------------|
|                          | <i>Raman</i>                   |                                           |
| Montmorillonite          | Fluorescence signal observed   | –                                         |
| Zeolite <sup>21–24</sup> | 492                            | Al-O-Al or Si-O-Si stretch                |
|                          | 713                            | Si-O bend                                 |
|                          | 973                            | Al-O-Al stretch, SiO <sub>4</sub> stretch |
|                          | 1048                           | Al-O bend, Si-O bend                      |
|                          | 1107                           | Si-O stretch                              |
|                          | 3446                           | O-H stretch                               |
| Arizona Test Dust (AZTD) | Fluorescence signal observed   | –                                         |



## References.

- 1 B. Ludwig and T. T. Burke, *Powders*, 2022, **1**, 47–61.
- 2 M. Al-Amin, S. Chandra Dey, T. U. Rashid, M. Ashaduzzaman and S. M. Shamsuddin, *Int. J. Latest Res. Engineering and Tech.*, 2016, **2**, 14–21.
- 3 L. A. Zemnukhova, A. E. Panasenko, A. P. Artem'yanov and E. A. Tsoy, *Bioresources*, 2015, **10**, 3713–3723.
- 4 M. Ocaña, V. Forniés and C. J. Serna, *J. Non-Cryst. Sol.*, 1989, **107**, 187-192.
- 5 S. V. Goryainov, A. S. Krylov, O. P. Polyansky and A. N. Vtyurin, *J. of Raman Spec.*, 2017, **48**, 1431–1437.
- 6 O. Frank, M. Zikalova, B. Laskova, J. Kürti, J. Koltai and L. Kavan, *Phys. Chem. Chemical Physics*, 2012, **14**, 14567–14572.
- 7 T. Ohsaka and Y. Fujiki, *J. Ram. Spec.* 1978, **7**, 321-324.
- 8 Y. Hu, H.-L. Tsai and C.-L. Huang, *J. Euro. Ceram. Soc.* 2003, **23**, 691-696.
- 9 H. A. Al-Hosney and V. H. Grassian, *Phys. Chem. Chemical Physics*, 2005, **7**, 1266–1276.
- 10 H. A. Al-Abadleh, H. A. Al-Hosney and V. H. Grassian, in *J. of Mol. Catalysis A: Chem.*, 2005, **228**, 47–54.
- 11 D. Peak, R. G. Ford and D. L. Sparks, *J. Colloid Int. Sci.*, 1999, **218**, 289–299.
- 12 X. Wang, Z. Wang, D. Peak, Y. Tang, X. Feng and M. Zhu, *ACS Earth Space Chem.*, 2018, **2**, 387–398.
- 13 A. L. Bondy, R. M. Kirpes, R. L. Merzel, K. A. Pratt, M. M. Banaszak Holl and A. P. Ault, *Anal. Chem.*, 2017, **89**, 8594–8598.
- 14 M. C. Yeung, A. K. Y. Lee and C. K. Chan, *Aerosol Sci. and Tech.*, 2009, **43**, 387–399.
- 15 S. Gunasekaran, G. Anbalagan and S. Pandi, *J. of Raman Spec.*, 2006, **37**, 892–899.
- 16 M. Jariwala, J. Crawford and D. J. LeCaptain, *Ind. Eng. Chem. Res.*, 2007, **46**, 4900–4905.
- 17 J. Qiu, X. Li and X. Qi, *J. IEEE Photonics* 2019, **11**, 1-13.
- 18 J. D. Rindelaub, R. L. Craig, L. Nandy, A. L. Bondy, C. S. Dutcher, P. B. Shepson and A. P. Ault, *J. of Phys. Chem. A*, 2016, **120**, 911–917.
- 19 M. N. Chan, A. K. Y. Lee and C. K. Chan, *Environ. Sci. Technol.*, 2006, **40**, 6983–6989.



- 20 H. A. Patel, R. S. Somani, H. C. Bajaj and R. V. Jasra, *Bulletin of Materials Sci.*, 2006, **29**, 133–145.
- 21 K. Byrappa and B. V Suresh Kumar, *Asian J. Chem.* 2007, **19**, 4933-4935.
- 22 M. Ritz, L. Vaculíková, J. Kupková, E. Plevová and L. Bartoňová, *Vib. Spectrosc.*, 2016, **84**, 7–15.
- 23 A. C. Gujar, A. A. Moye, P. A. Coghill, D. C. Teeters, K. P. Roberts and G. L. Price, *Microporous and Mesoporous Mat.*, 2005, **78**, 131–137.
- 24 Y. L. Tsai, E. Huang, Y. H. Li, H. T. Hung, J. H. Jiang, T. C. Liu, J. N. Fang and H. F. Chen, *Minerals*, 2021, **11**, 1–14.
